# Supplementary material
Source: JCI journal article supplement (doi:10.1172/jci179530)
Supplement: sd2 [file 2]

**Figure 1H**

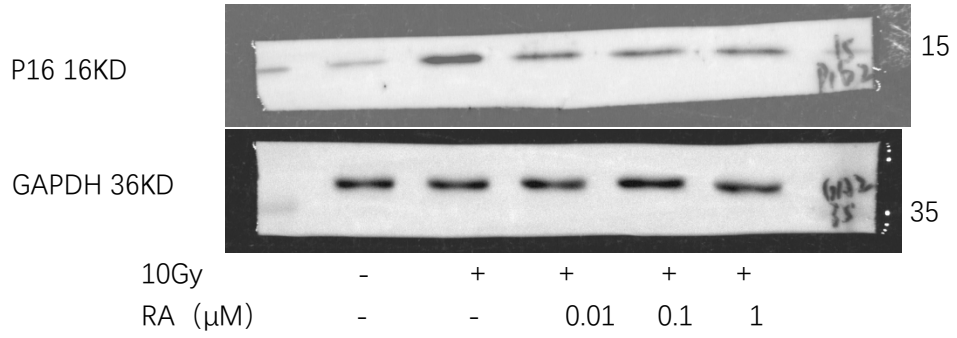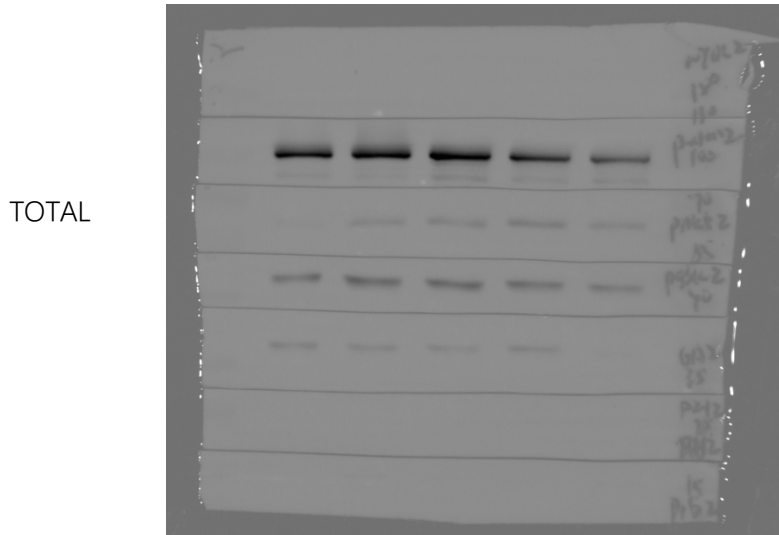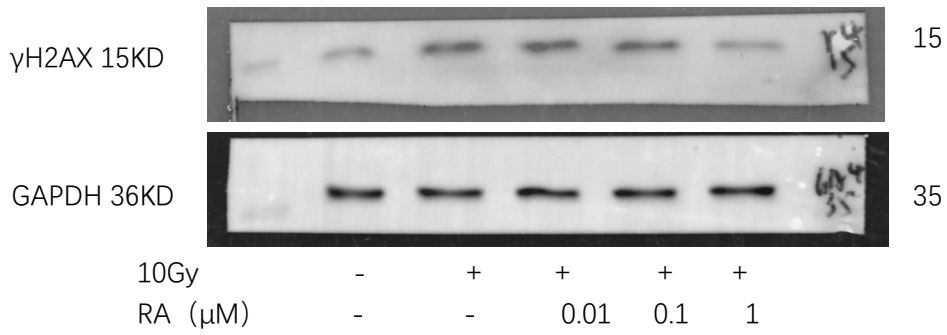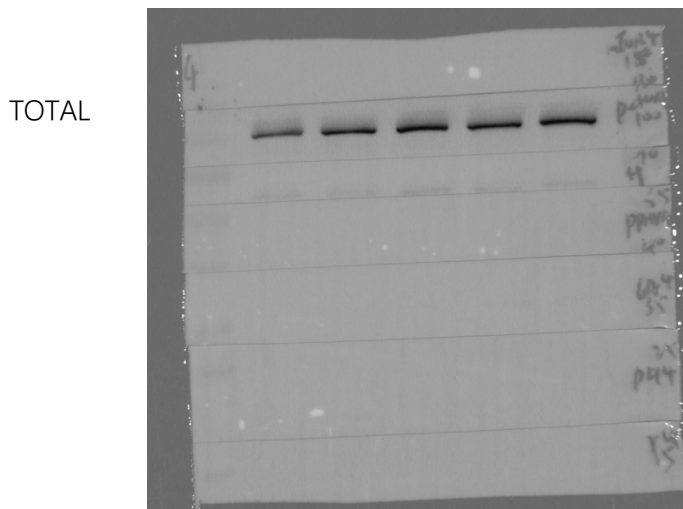

Figure 3H

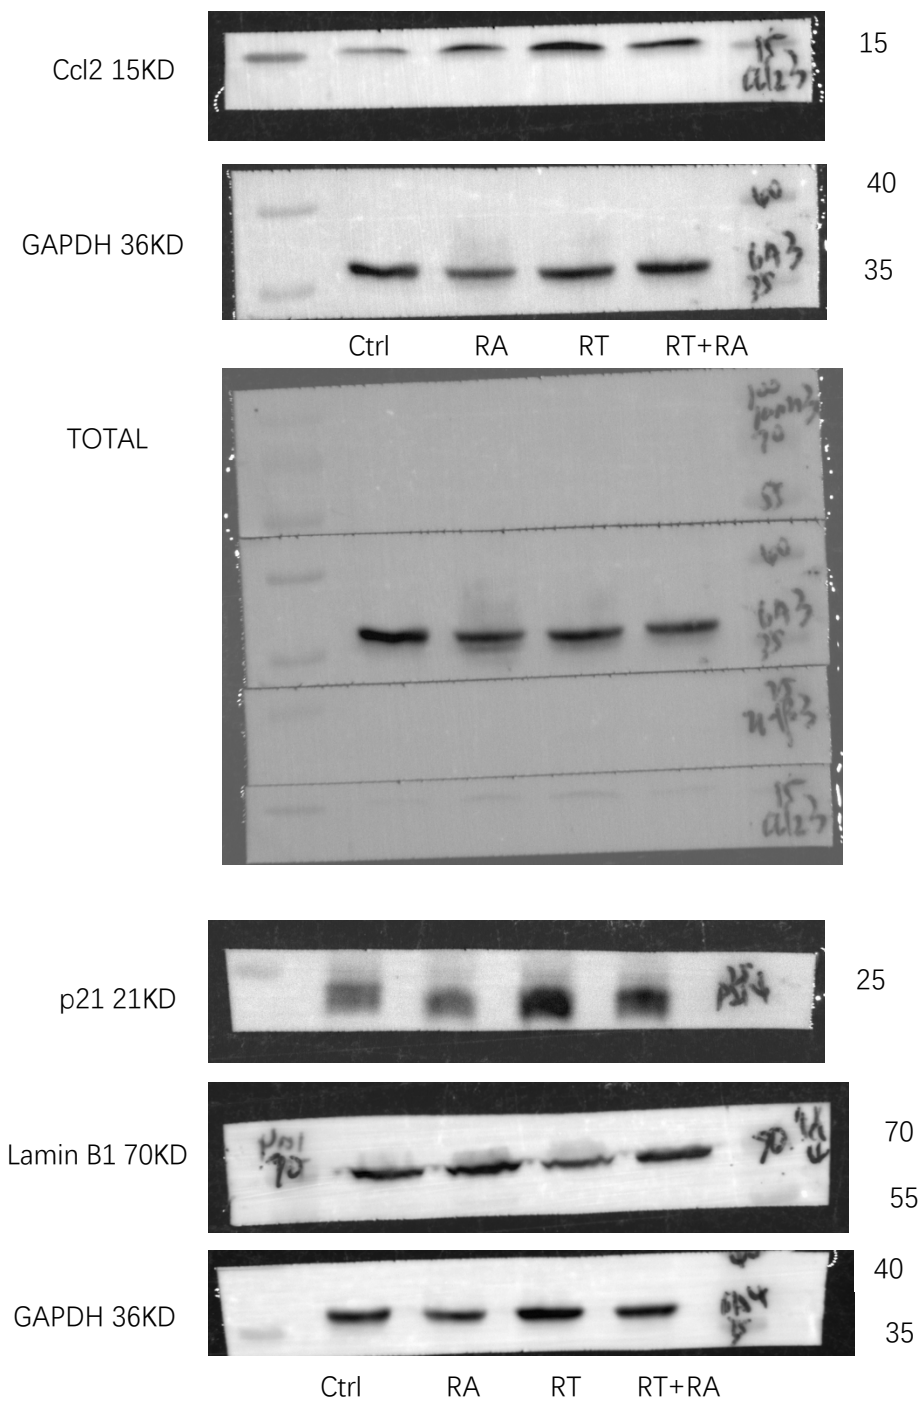

TOTAL

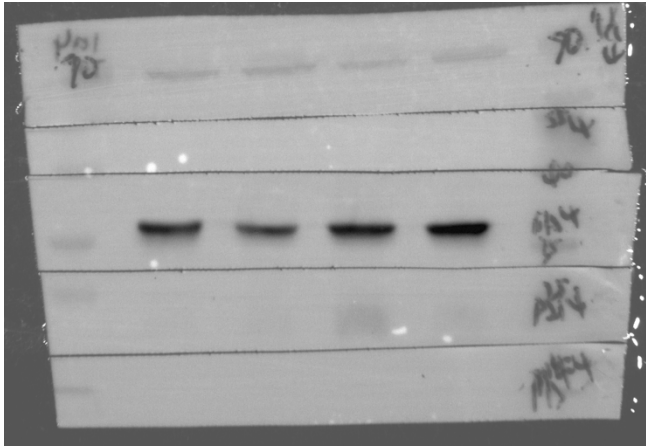

IL6 23KD

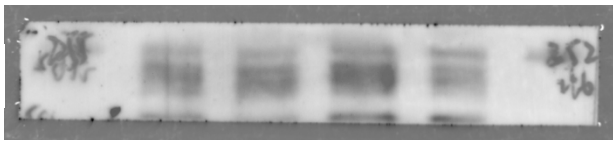

25

GAPDH 36KD

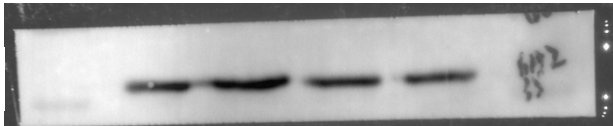

40

35

Ctrl RA RT RT+RA

IL1B 23KD

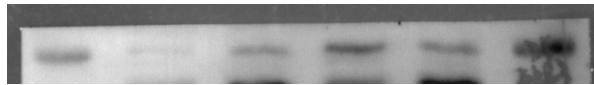

25

GAPDH 36KD

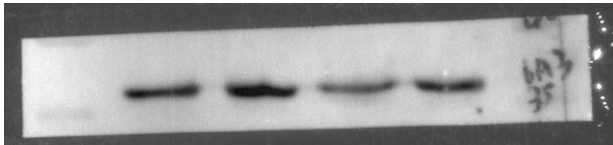

40

35

Ctrl RA RT RT+RA

Figure 4J

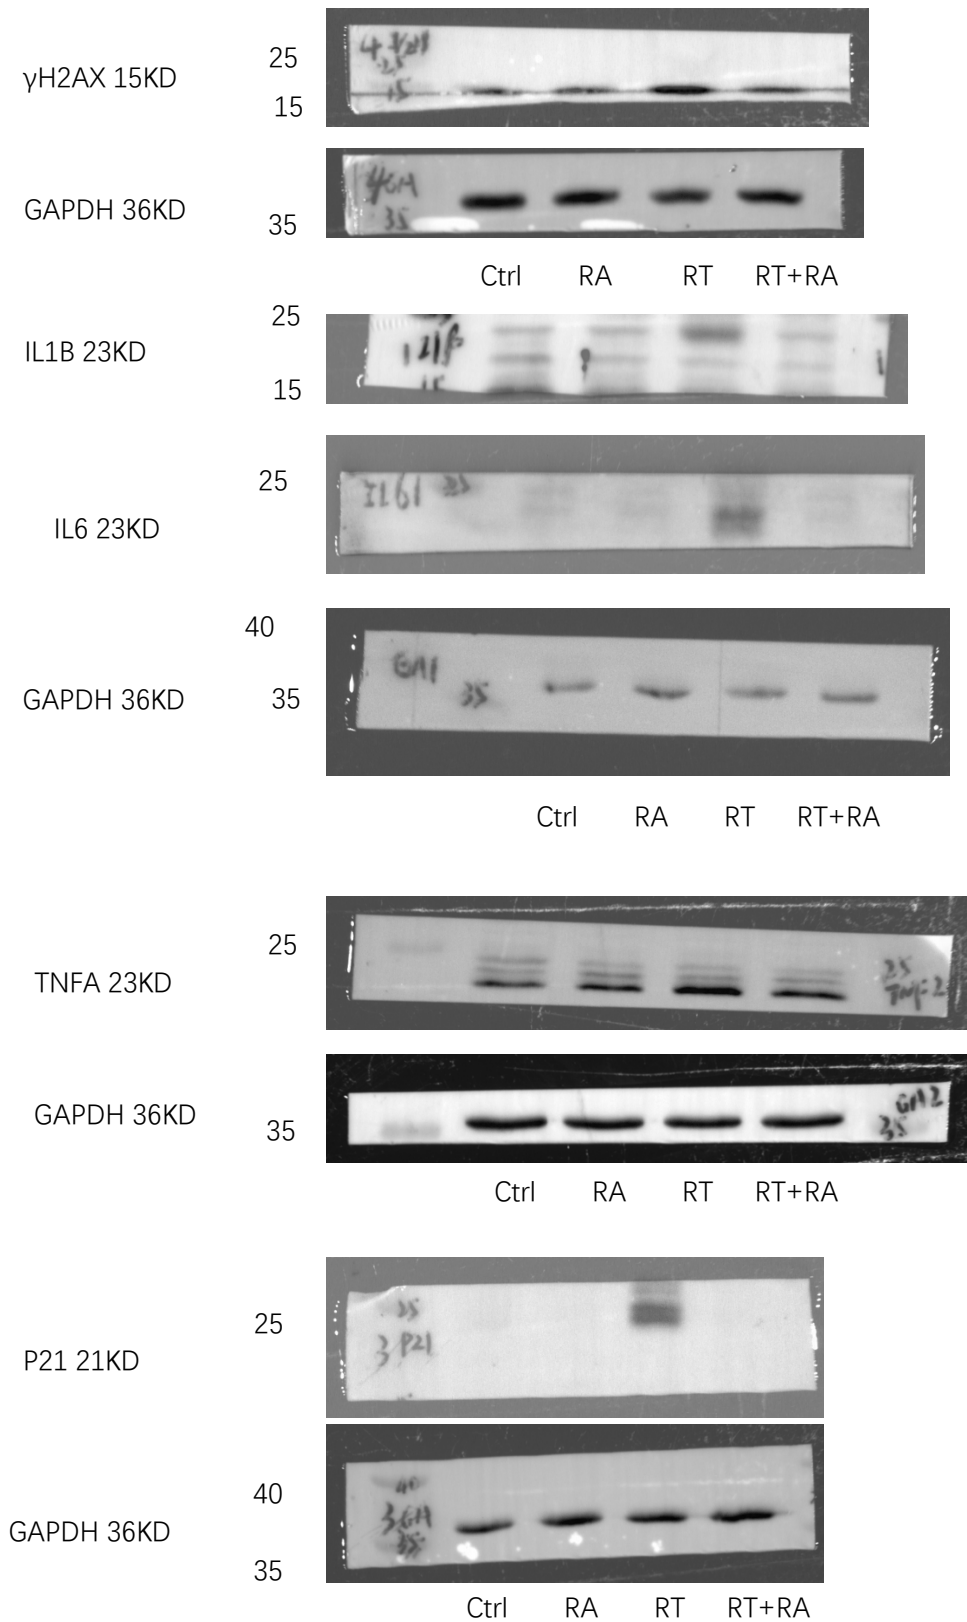

Figure 5A

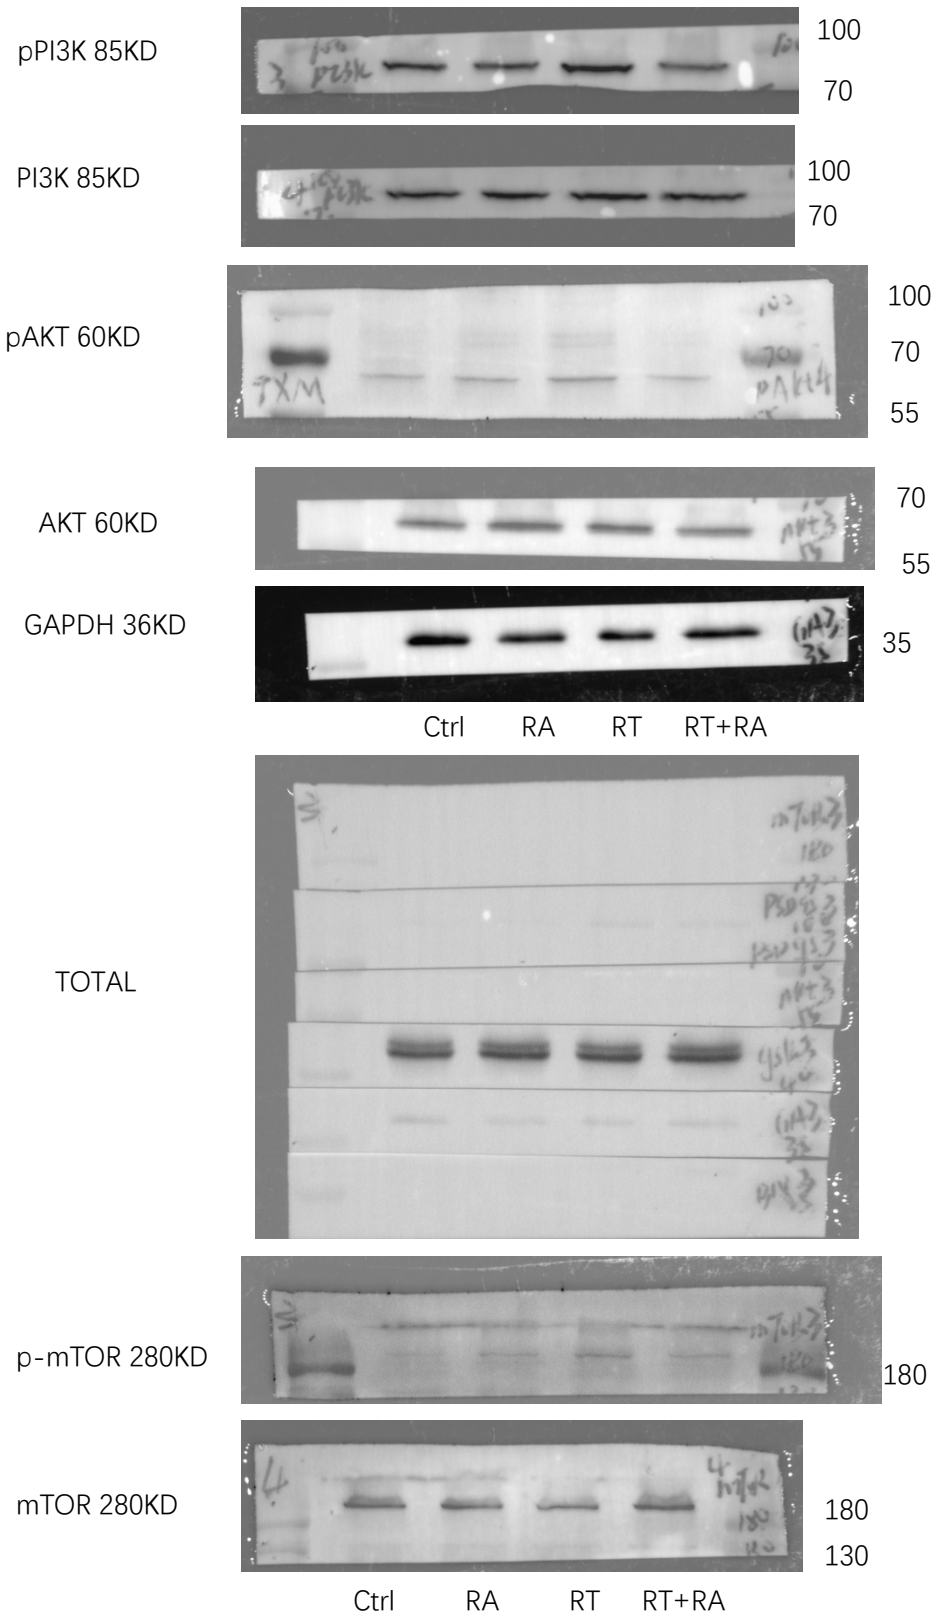

PPAR $\alpha$  54KD

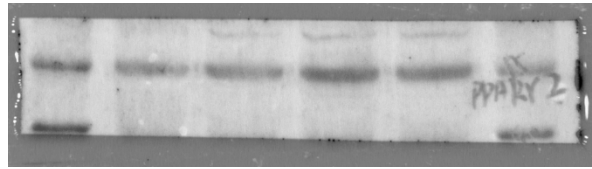

55  
40

GAPDH 36KD

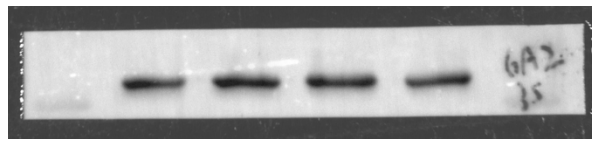

35

Ctrl RA RT RT+RA

TOTAL

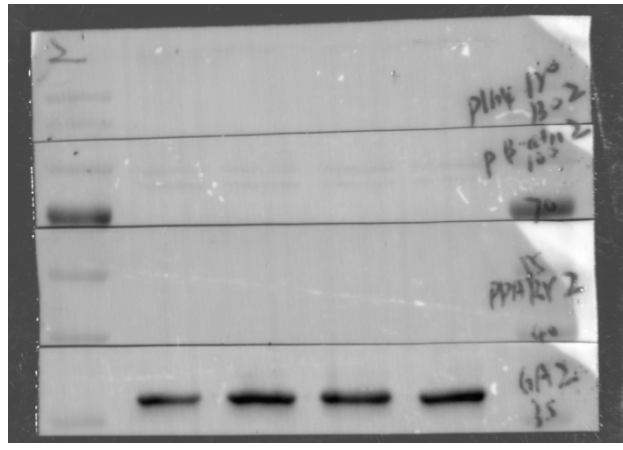

180  
130

Plin4 134 KD

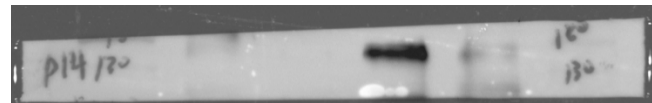

GAPDH 36KD

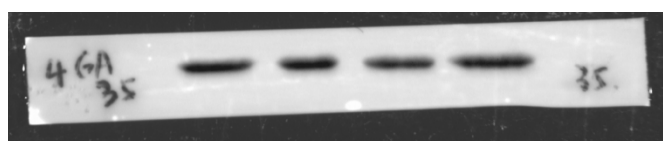

35

Ctrl RA RT RT+RA

TOTAL

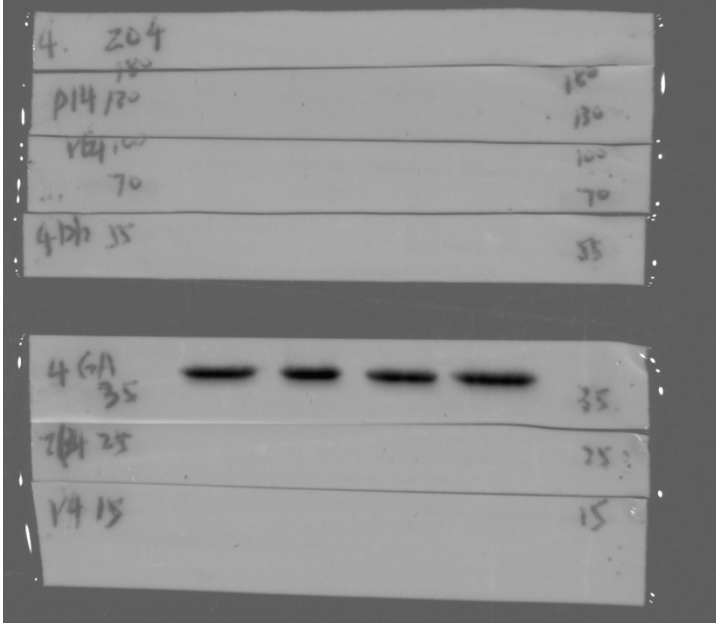

180  
130  
100  
70  
35

35  
25  
15

**Supplemental Figure 1D**

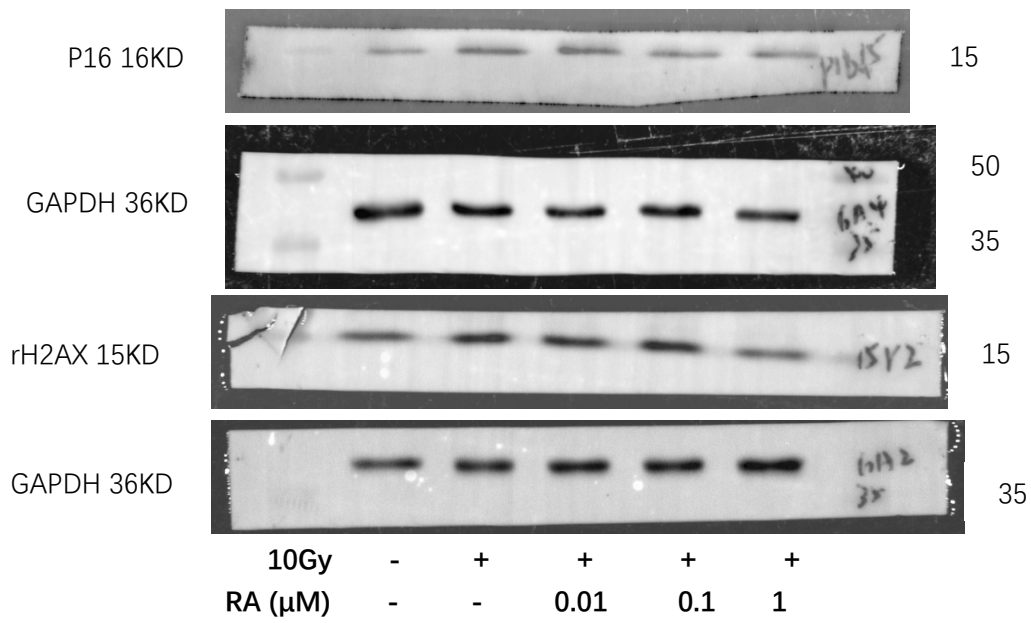

**Supplemental Figure 3F**

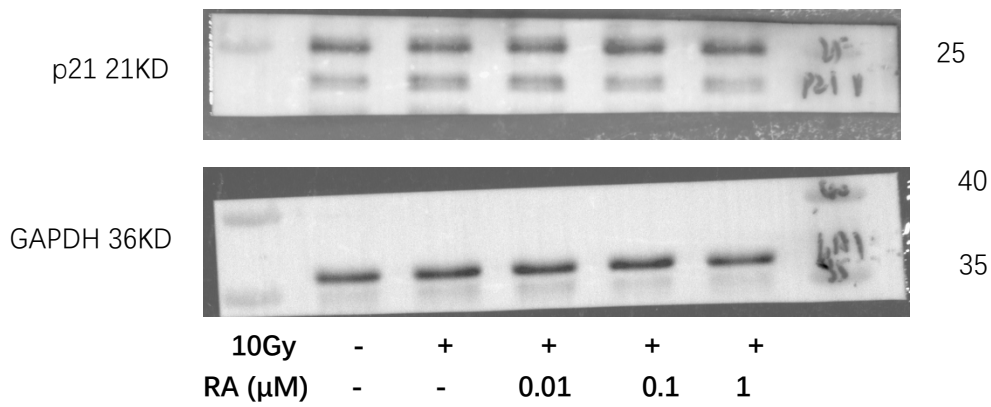

**Supplemental Figure 4M**

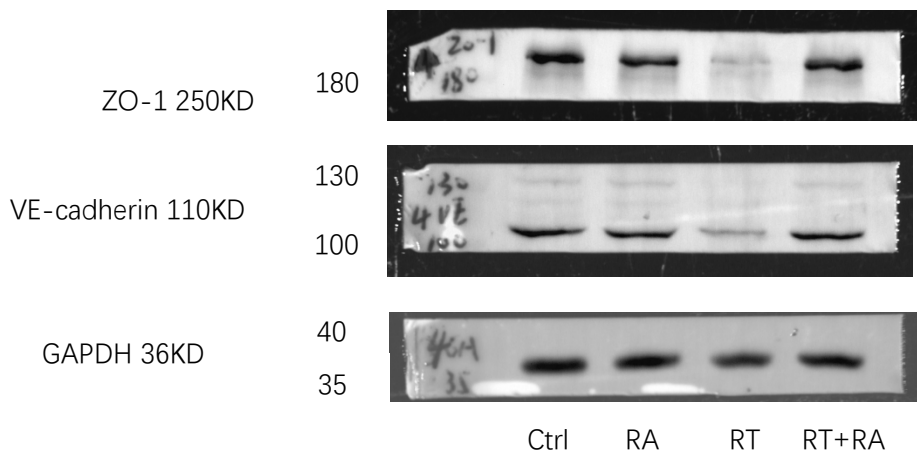

Supplemental Figure 5D

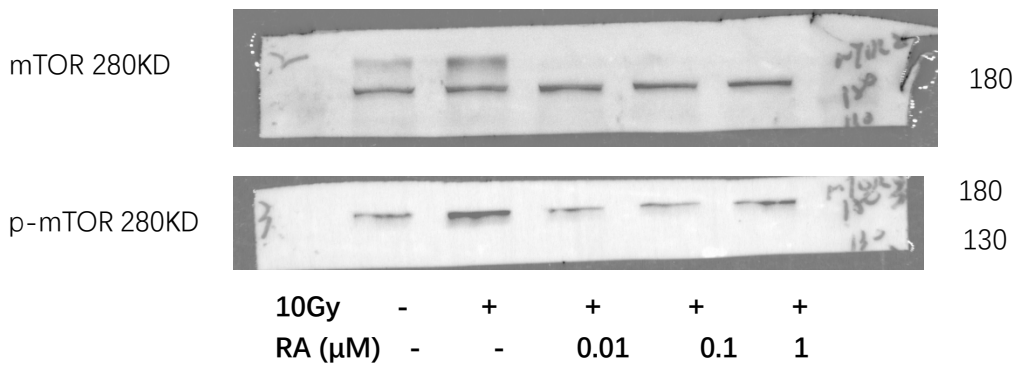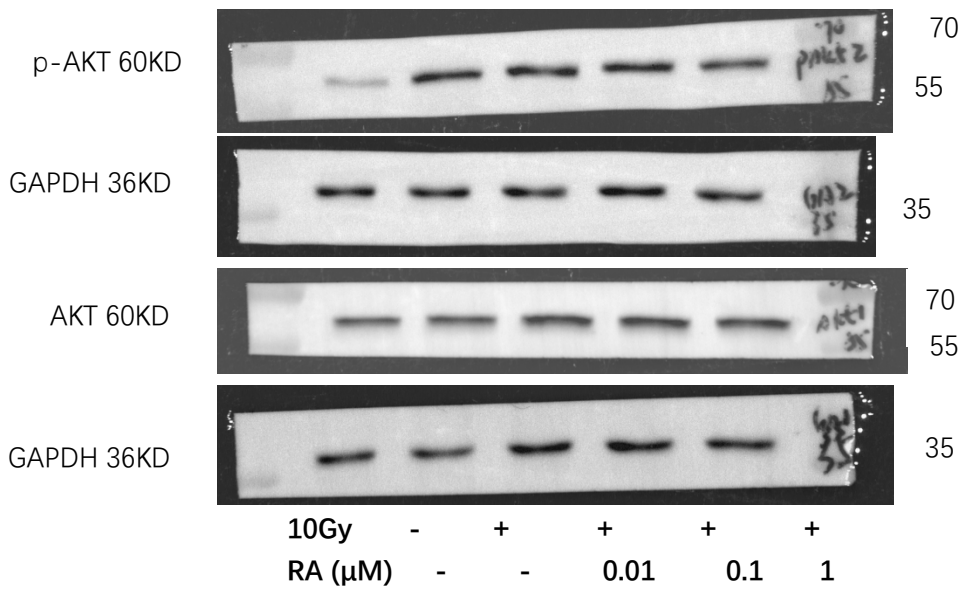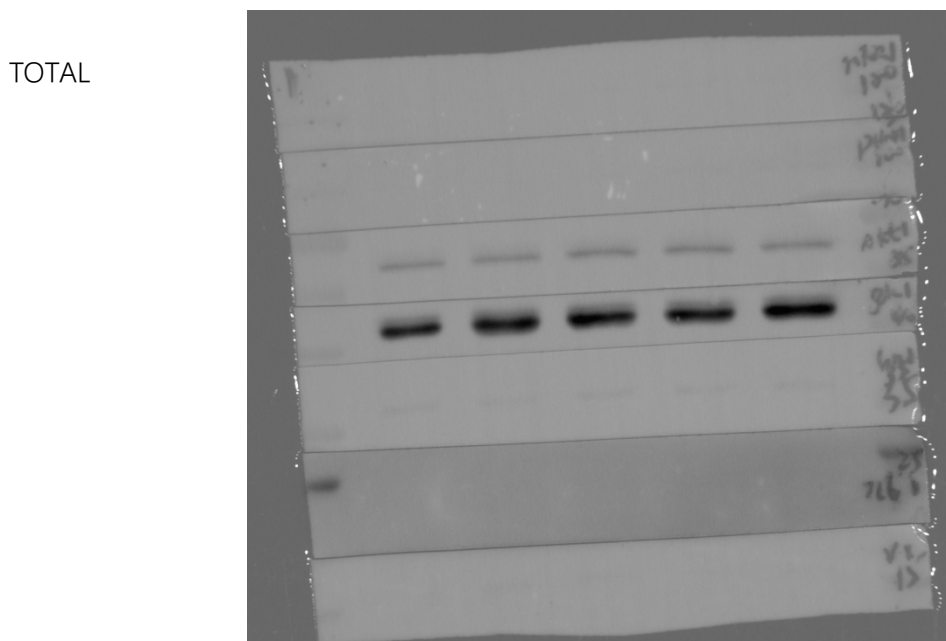

Plin4 100KD

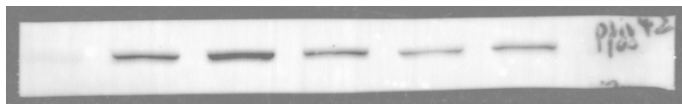

100

GAPDH 36KD

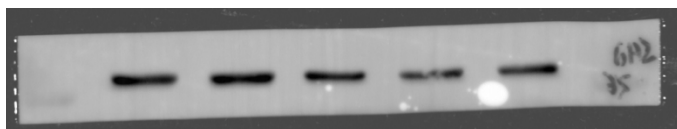

35

TOTAL

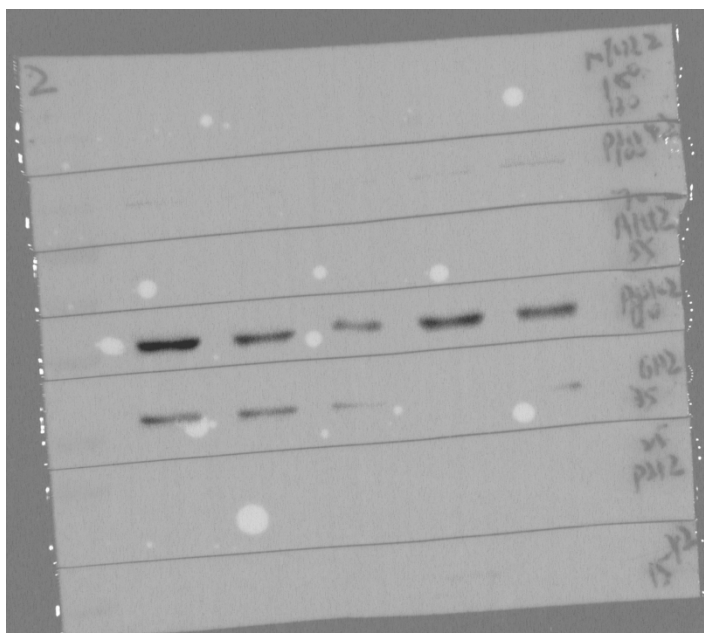

PPAR $\alpha$  54KD

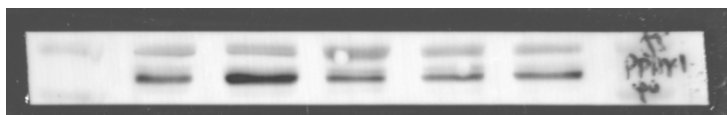

55

40

GAPDH 36KD

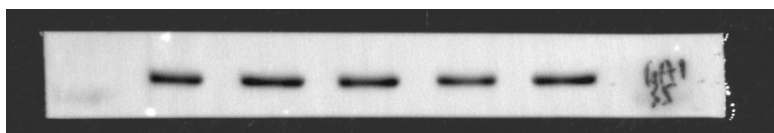

35

|               |   |   |      |     |   |
|---------------|---|---|------|-----|---|
| 10Gy          | - | + | +    | +   | + |
| RA ( $\mu$ M) | - | - | 0.01 | 0.1 | 1 |

TOTAL

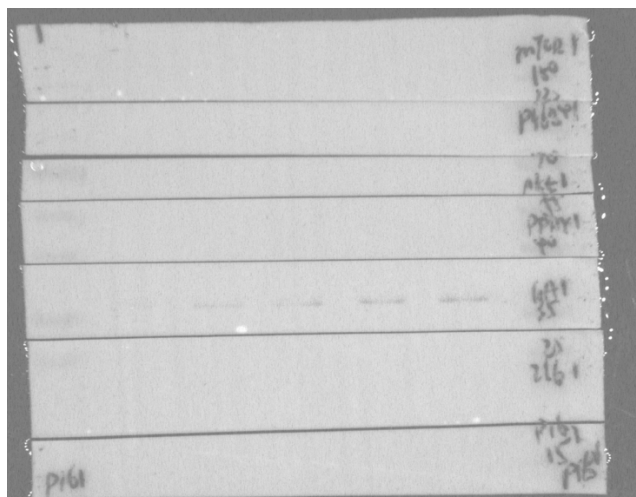

Supplemental Figure 5E

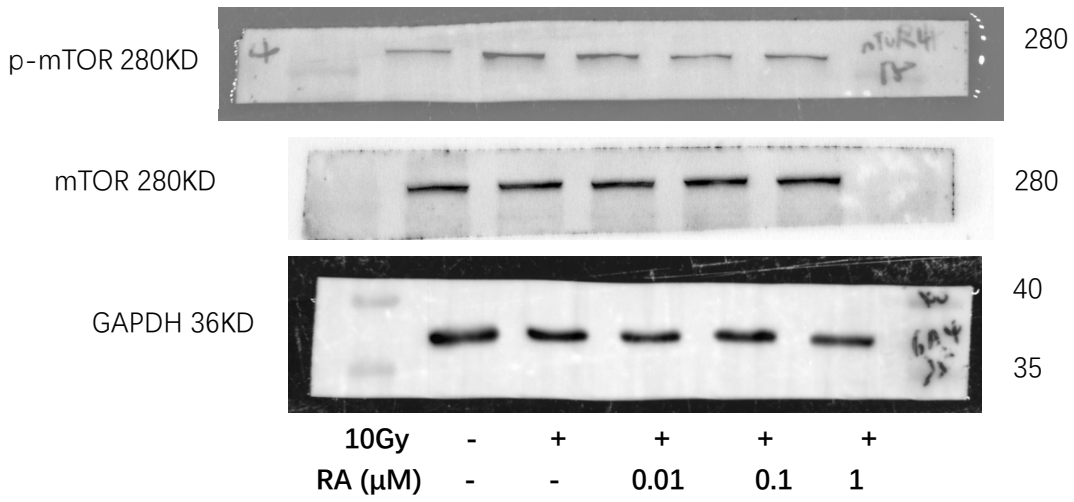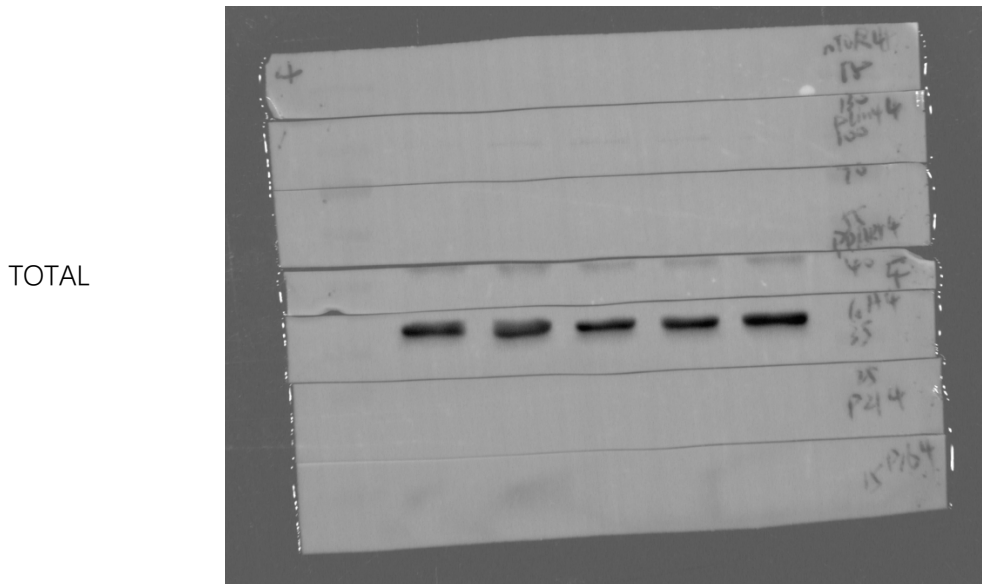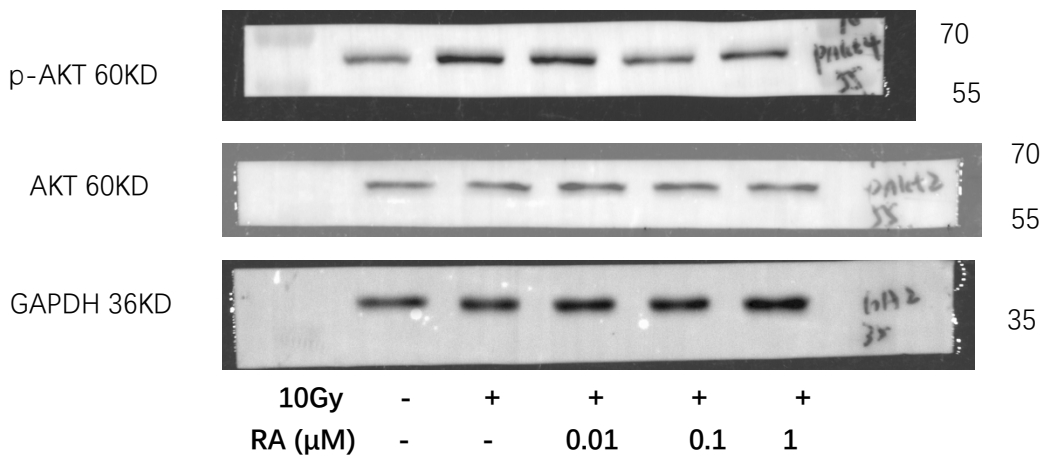

TOTAL

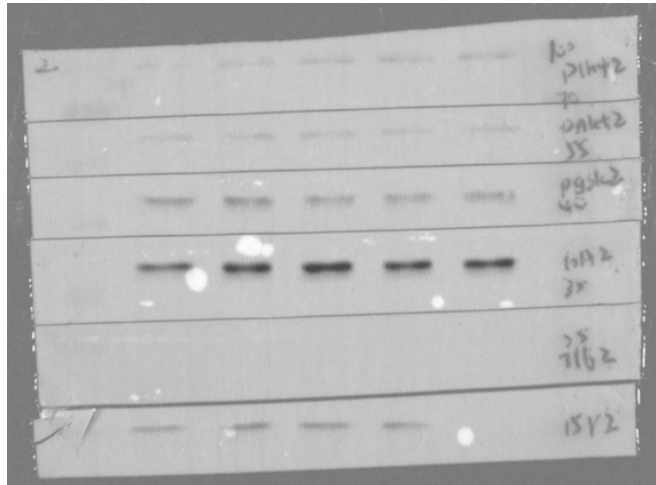

Plin4 100KD

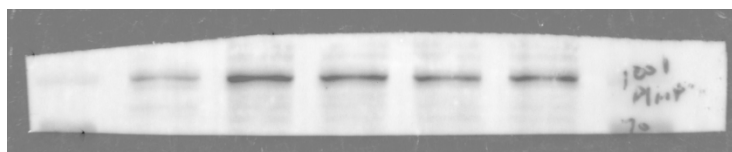

100  
70

GAPDH 36KD

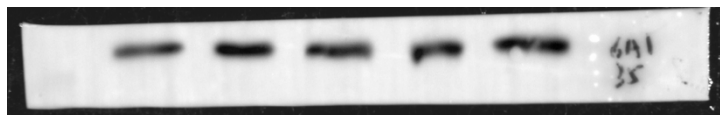

35

|               |   |   |      |     |   |
|---------------|---|---|------|-----|---|
| 10Gy          | - | + | +    | +   | + |
| RA ( $\mu$ M) | - | - | 0.01 | 0.1 | 1 |

TOTAL

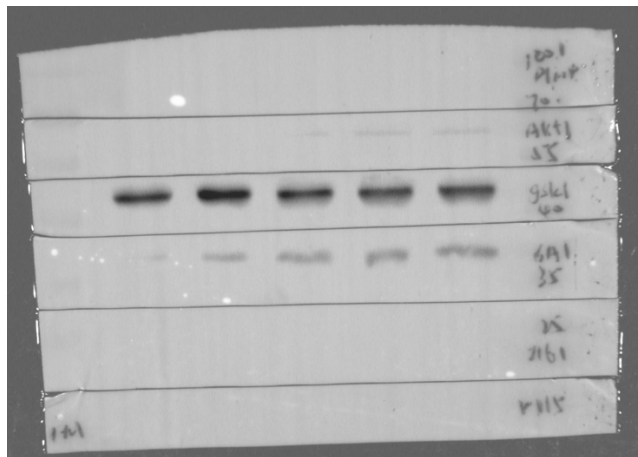

PPAR $\gamma$  54KD

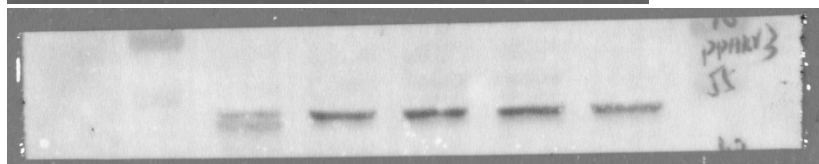

70  
55  
40

|               |   |   |      |     |   |
|---------------|---|---|------|-----|---|
| 10Gy          | - | + | +    | +   | + |
| RA ( $\mu$ M) | - | - | 0.01 | 0.1 | 1 |
